# Supplementary material for: Efficacy and safety of adrenocorticotropic hormone treatment in glomerular diseases: a systematic review and meta-analysis
Source: PubMed Central journal article supplement — Clin Kidney J. 2016 May 26;9(3):387–96. doi: 10.1093/ckj/sfw045 (PMC4886926; doi:10.1093/ckj/sfw045), 2016-05-26

**Item S1.** Search Strategy

Database: Ovid, MEDLINE, Cochrane Database of Systematic Reviews, Cochrane Central Register of Controlled Trials until July 18<sup>th</sup>, 2015

1. nephrotic.mp.
2. Nephrosis/ or Nephrosis.mp.
3. Nephrosis, Lipoid/ or Nephrosis/
4. Minimal change disease.mp.
5. Focal segmental glomerulosclerosis.mp.
6. FSGS.mp.
7. Membranous nephropathy.mp.
8. Nephropathy.mp.
9. Nephritis.mp.
10. Glomerulonephritis.mp.
11. Glomerulonephropathy.mp.
12. 1 or 2 or 3 or 4 or 5 or 6 or 7 or 8 or 9 or 10 or 11
13. Acthar.mp.
14. ACTH.mp.

15. adrenocorticotropic.mp.

16. 13 or 14 or 15

17. 12 and 16

18. limit 17 to humans

**Table S1.** Summary of Studies of Adrenocorticotrophic Hormone Therapy in other glomerular diseases

| Author                        | Number of Patients | Immunosuppression Response Category | ACTH Preparation | Total Dose (per week) | Duration of Treatment (months) | Follow-up Duration (month) | CR | PR | NR | Early Termination |
|-------------------------------|--------------------|-------------------------------------|------------------|-----------------------|--------------------------------|----------------------------|----|----|----|-------------------|
| <b>IgA nephropathy</b>        |                    |                                     |                  |                       |                                |                            |    |    |    |                   |
| Khastgir et al (2015) [25]*** | 5                  | 1 IR/ 4 naïve                       | Natural          | 160 U                 | > 6                            | > 6                        | 0  | 2  | 2  | 1                 |
| Madan et al (2014) [24]**     | 5                  | NA                                  | Natural          | 160 U                 | > 6                            | > 6                        | 0  | 1  | 3  | 1                 |
| Bomback et al (2012)[5] **    | 5                  | NA                                  | Natural          | 160 U                 | 6                              | 6                          | 1  | 1  | 2  | 1                 |
| Bomback et al (2011)[4] **    | 1                  | 1 naïve                             | Natural          | 80 U                  | 8                              | 8                          | 1  | 0  | 0  | 0                 |
| <b>Lupus nephritis</b>        |                    |                                     |                  |                       |                                |                            |    |    |    |                   |
| Khastgir et al (2015) [25]*** | 2                  | 2 IR                                | Natural          | 160 U                 | > 6                            | > 6                        | 0  | 2  | 0  | 0                 |
| Madan et al (2014)[24] **     | 1                  | NA                                  | Natural          | 160 U                 | > 6                            | > 6                        | 0  | 1  | 0  | 0                 |
| Berg et al (2013)[21] ***     | 5                  | 2 naïve                             | Synthetic        | 2 mg                  | 6 (2-18)                       | 24 (6-72)                  | NA | NA | NA | 0                 |
| Bomback et al (2011) [4]**    | 1                  | 1 naïve                             | Natural          | 80 U                  | 5                              | 8                          | 0  | 0  | 1  | 0                 |
| <b>MPGN</b>                   |                    |                                     |                  |                       |                                |                            |    |    |    |                   |
| Lorusso et al (2015)[7] *     | 3                  | NA                                  | Synthetic        | 1 mg                  | 12                             | 48                         | 1  | 0  | 1  | 1                 |
| Madan et al (2014)[24] **     | 1                  | NA                                  | Natural          | 160 U                 | > 6                            | > 6                        | 0  | 0  | 1  | 0                 |
| Bomback et al S (2011)[4] **  | 4                  | 4 IR                                | Natural          | 120-160 U             | 5 (4-6)                        | 6 (6-8)                    | 0  | 0  | 4  | 0                 |
| <b>Diabetic nephropathy</b>   |                    |                                     |                  |                       |                                |                            |    |    |    |                   |
| Madan et al (2014)[24] **     | 2                  | NA                                  | Natural          | 160 U                 | > 6                            | > 6                        | 0  | 0  | 1  | 0                 |
| Tumlin et al (2013) [23]*     | 14                 | NA                                  | Natural          | 112-224 U             | 6                              | 6                          | 1  | 7  | 0  | 0                 |
| Berg et al (2004)[27] **      | 2                  | NA                                  | Synthetic        | 0.5-2 mg              | 5.5 (5-6)                      | 18 (12-24)                 | 0  | 2  | 0  | 0                 |

ACTH, adrenocorticotrophic hormone; CR, complete response; IR, immunosuppression resistant (other than steroids); NA, data not available; NR, no response; PR partial response.

\* CR defined as urine protein excretion <300 mg/day; PR defined as >50% reduction of proteinuria and urine protein excretion <3.5 g/day.

\*\* CR defined as urine protein excretion <500 mg/day; PR defined as >50% reduction of proteinuria and urine protein excretion <3.5 g/day.

\*\*\* Response criteria were not provided.

**Figure S1.** Forest Plots of Incidence Rates of Adverse Effects

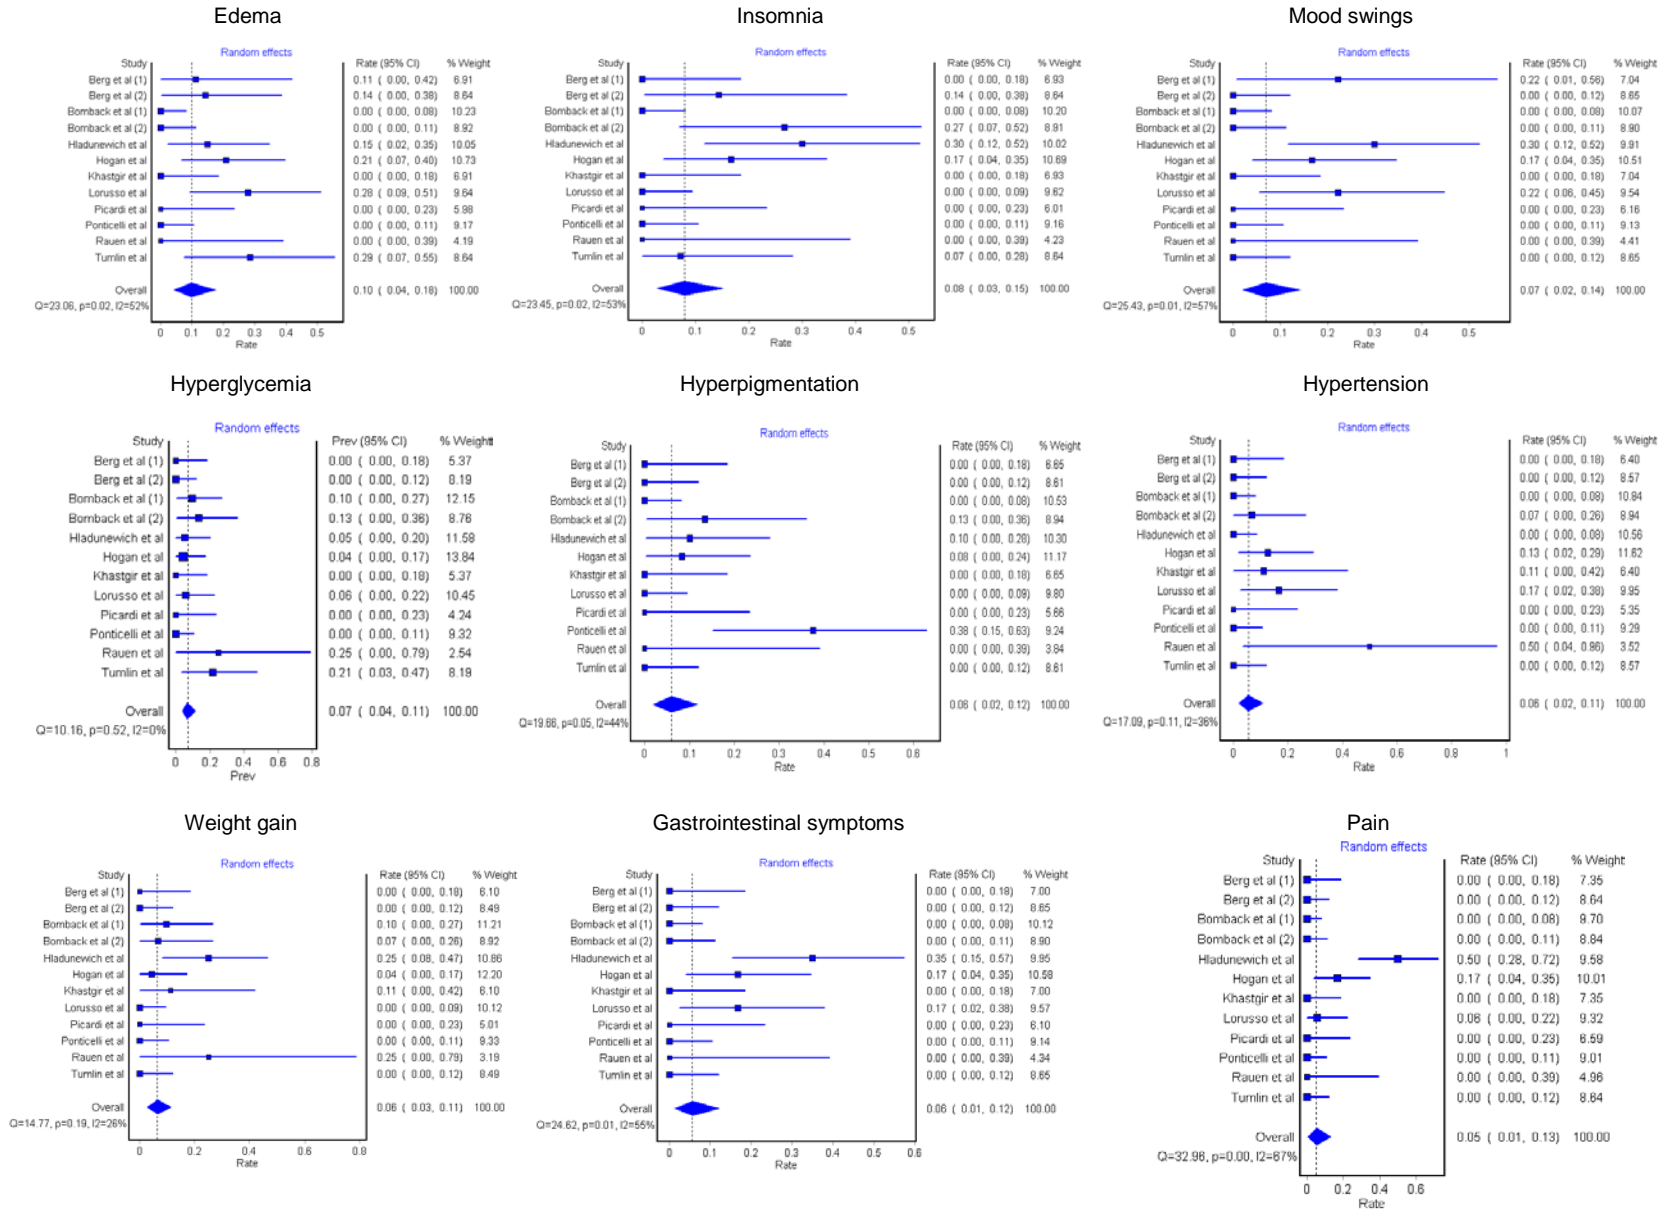

**Figure S1.** Forest Plots of Incidence Rates of Adverse Effects (continue)

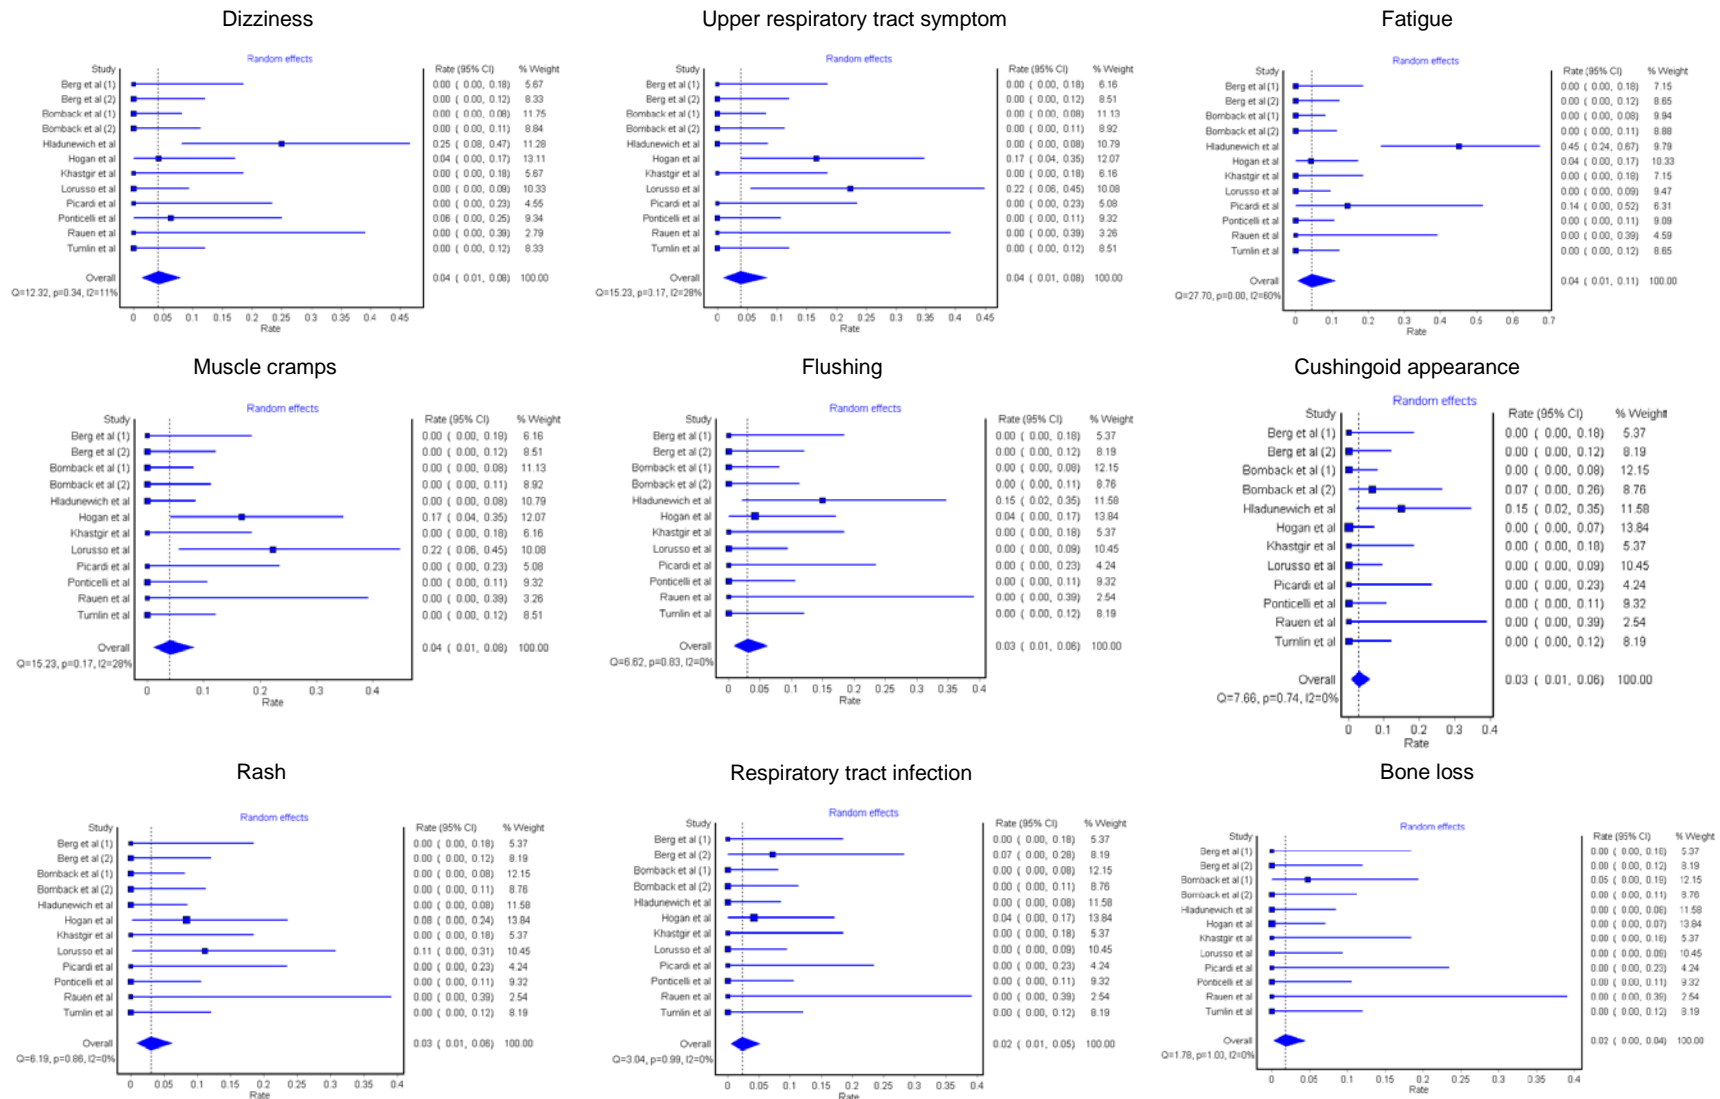

**Figure S1.** Forest Plots of Incidence Rates of Adverse Effects (continue)

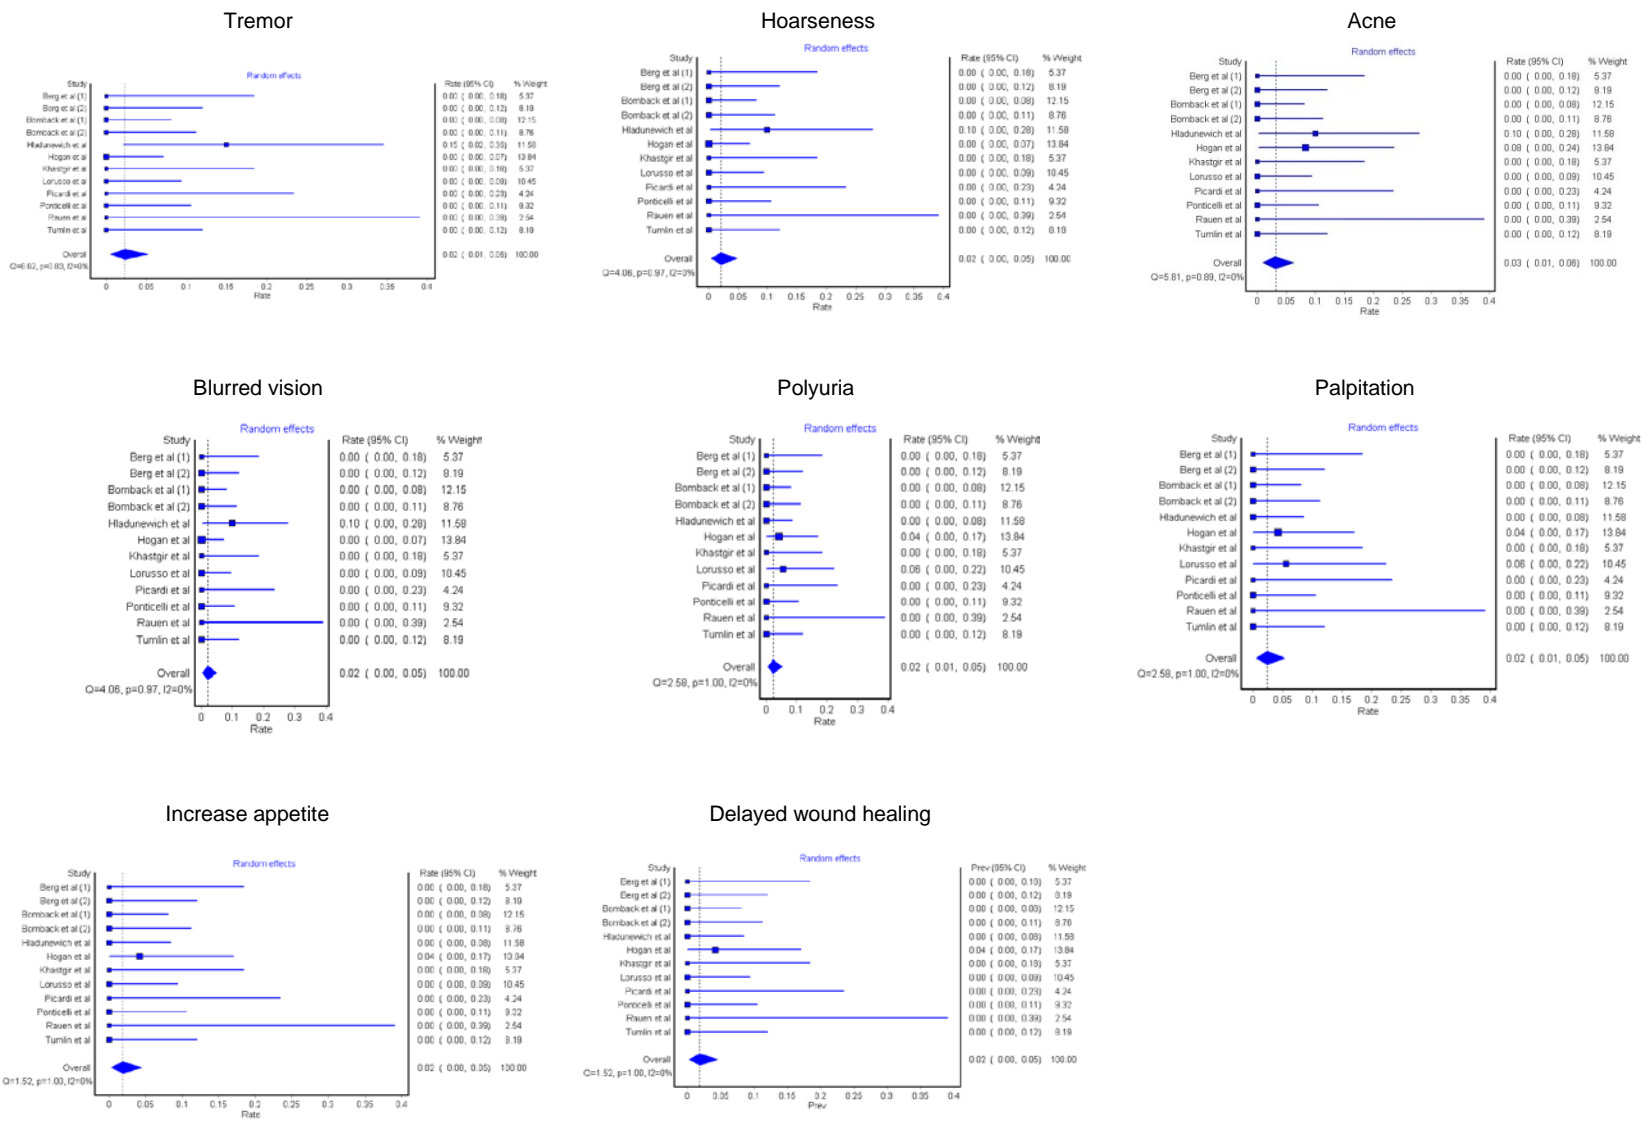

**Figure S2.** Funnel Plots Showing Logarithmized Incidence Rate of Side Effects.

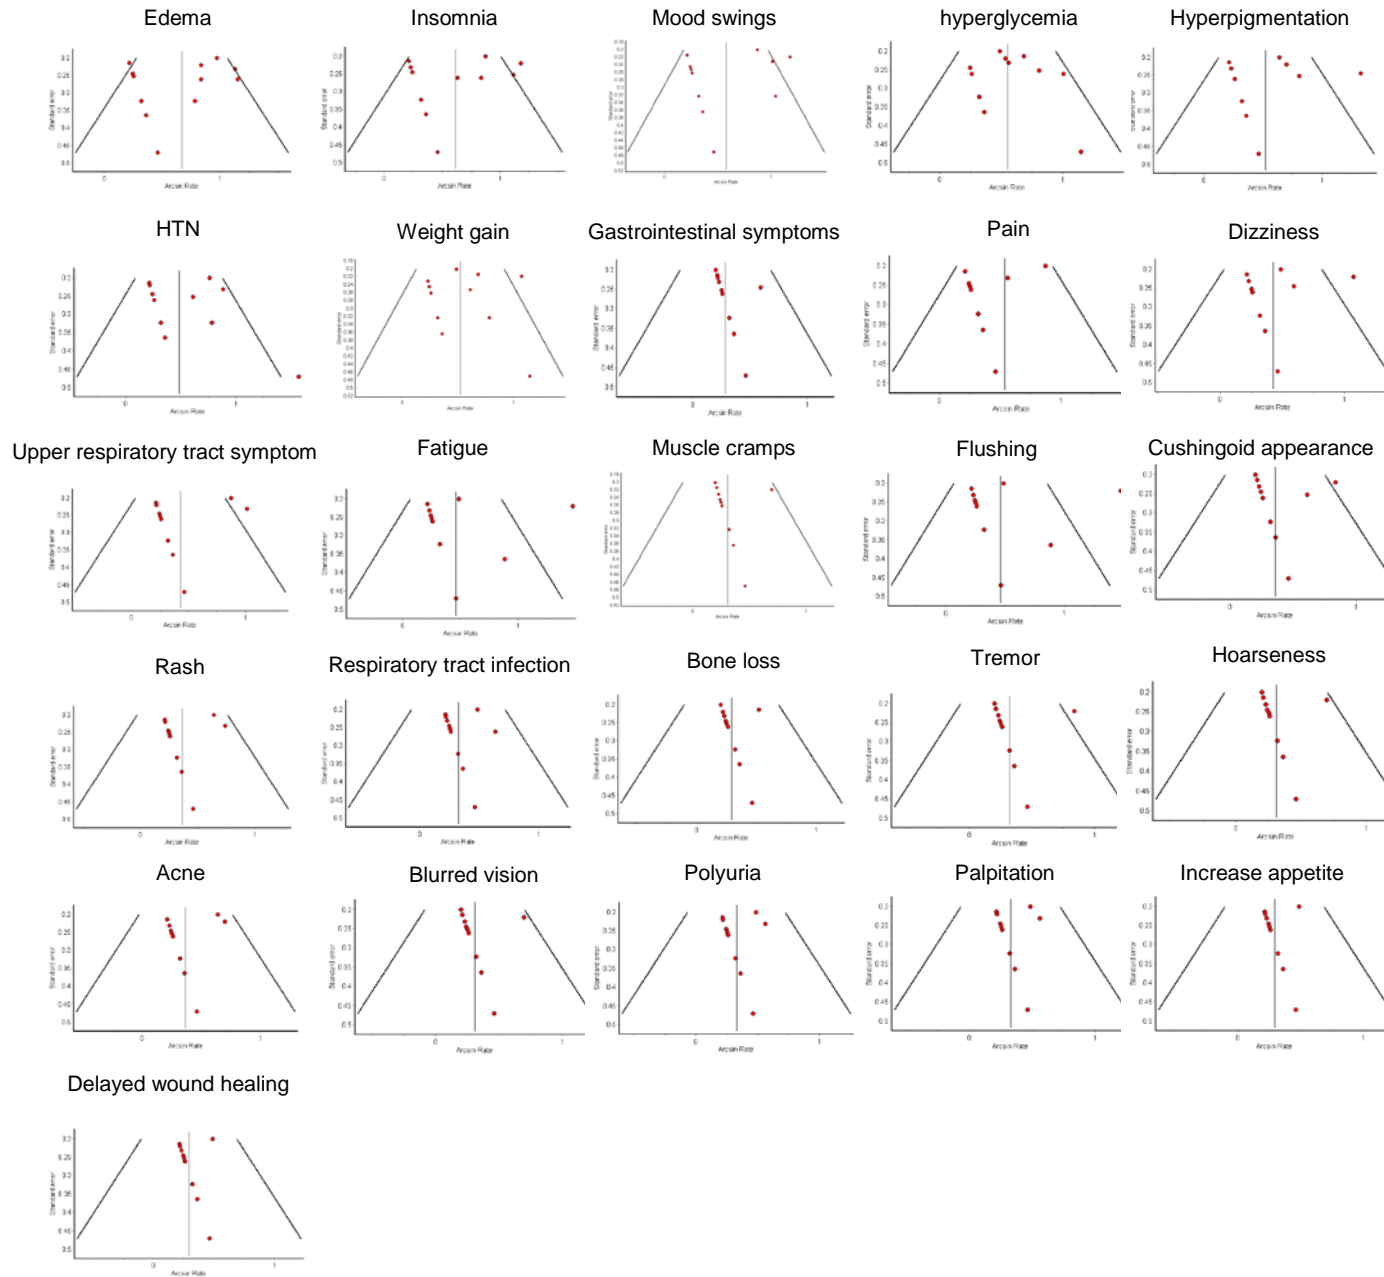

Supplement: supp_sfw045_sfw045supp.pdf [file supp_sfw045_sfw045supp.pdf]
